# Supplementary material for: Baseline characteristics for phase II of the Kinshasa Malaria Cohort Study: cohort profile
Source: PubMed Central journal article supplement (PMC11603822; doi:10.1136/bmjopen-2024-085360), 2024-11-27
Supplement: bmjopen-14-11-s001.pdf [file bmjopen-14-11-s001.pdf]

## Supplement 1

### Supporting document: Comparison of Phase I and Phase II study population characteristics

| Study Population    |                | Phase I<br>2015 -2017 |     | Phase II<br>2018 - 2022 |     | p-value |
|---------------------|----------------|-----------------------|-----|-------------------------|-----|---------|
|                     |                | n                     | %   | n                       | %   |         |
| Total population    |                | 1591                  |     | 1635                    |     |         |
|                     |                | n                     | %   | n                       | %   | p-value |
| <b>Age</b>          |                |                       |     |                         |     |         |
|                     | <5             | 366                   | 23% | 284                     | 17% | 0.000   |
|                     | 5-14           | 495                   | 31% | 530                     | 32% | 0.427   |
|                     | 15+            | 730                   | 46% | 821                     | 50% | 0.014   |
|                     |                |                       |     |                         |     |         |
| <b>Sex</b>          |                |                       |     |                         |     |         |
|                     | Male           | 713                   | 45% | 741                     | 45% | 0.773   |
|                     | Female         | 878                   | 55% | 894                     | 55% | 0.773   |
|                     |                |                       |     |                         |     |         |
| <b>Health_Areas</b> |                |                       |     |                         |     |         |
|                     | Bu             | 675                   | 42% | 586                     | 36% | 0.000   |
|                     | Kimpoko        | 528                   | 33% | 588                     | 36% | 0.097   |
|                     | Voix du Peuple | 388                   | 24% | 461                     | 28% | 0.014   |
|                     |                |                       |     |                         |     |         |
| <b>Sites</b>        |                |                       |     |                         |     |         |
|                     | Bu             | 209                   | 13% | 196                     | 12% | 0.325   |
|                     | Impuru         | 217                   | 14% | 200                     | 12% | 0.234   |
|                     | Pema           | 249                   | 16% | 190                     | 12% | 0.001   |
|                     | Ngamanzo       | 268                   | 17% | 250                     | 15% | 0.229   |
|                     | Iye            | 92                    | 6%  | 117                     | 7%  | 0.113   |
|                     | Kimpoko        | 168                   | 11% | 221                     | 14% | 0.010   |
|                     | Voix du Peuple | 388                   | 24% | 461                     | 28% | 0.014   |

We used R to perform two-sample proportion tests in key participant characteristics to test for differences between the two phases. The test results indicated some statistically significant but small differences (0%-6%) between Phase I's and Phase II's populations. Migration and aging populations influenced differences in age and study sites. The site differences drove the differences found at the health area level.
